# Supplementary material for: RadA, a Key Gene of the Circadian Rhythm of Escherichia coli
Source: MDPI journal article supplement (doi:10.3390/ijms23116136), 2022-05-30
Supplement: s1 [file s1]

## Supplementary Materials

**A.**

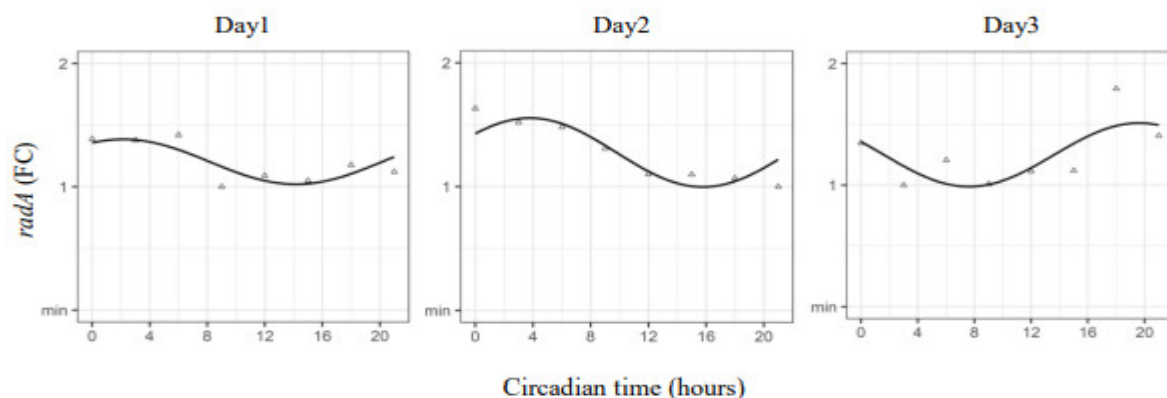

**B.**

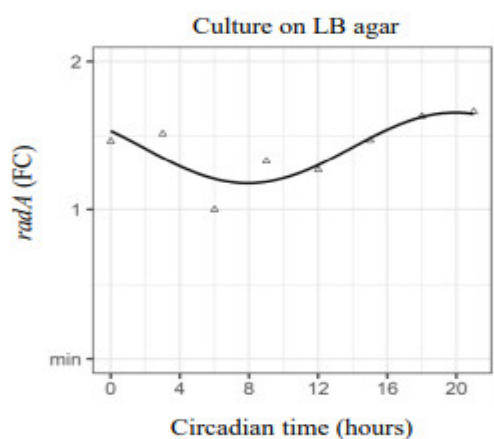

**Figure S1. Circadian expression of *radA* in *E. coli* cultured on LB agar and persistence overtime.** (A) Bacteria were spotted on blood agar with  $7 \cdot 10^5$  bacteria per point and incubated at 37°C for 24 hours. Colonies were then collected every 3 hours during 3 consecutive days. The expression of the *radA* gene was evaluated by q-RTPCR and expressed as fold change (FC) using the  $2^{-\Delta\Delta C_t}$  formula. The triangles correspond to the raw data without Cosinor transformation; the sinusoids represent the expression of the genes over time after adjustment of the values by the Cosinor model. Statistical analysis was performed using the cosine function in R studio (the results are representatives of three experiments). (B) Bacteria were spotted on LB agar with  $7 \cdot 10^5$  bacteria per point and incubated at 37°C for 24 hours. Colonies were then collected every 3 hours for 24 hours. The expression of *radA* was evaluated by q-RTPCR and expressed as fold change (FC) using the  $2^{-\Delta\Delta C_t}$  formula. The triangles correspond to the raw data without Cosinor transformation; the sinusoids represent the expression of the genes over time after adjustment of the values by the Cosinor model. Statistical analysis was performed using the cosine function in R studio (the results are representatives of three experiments).

**A.**

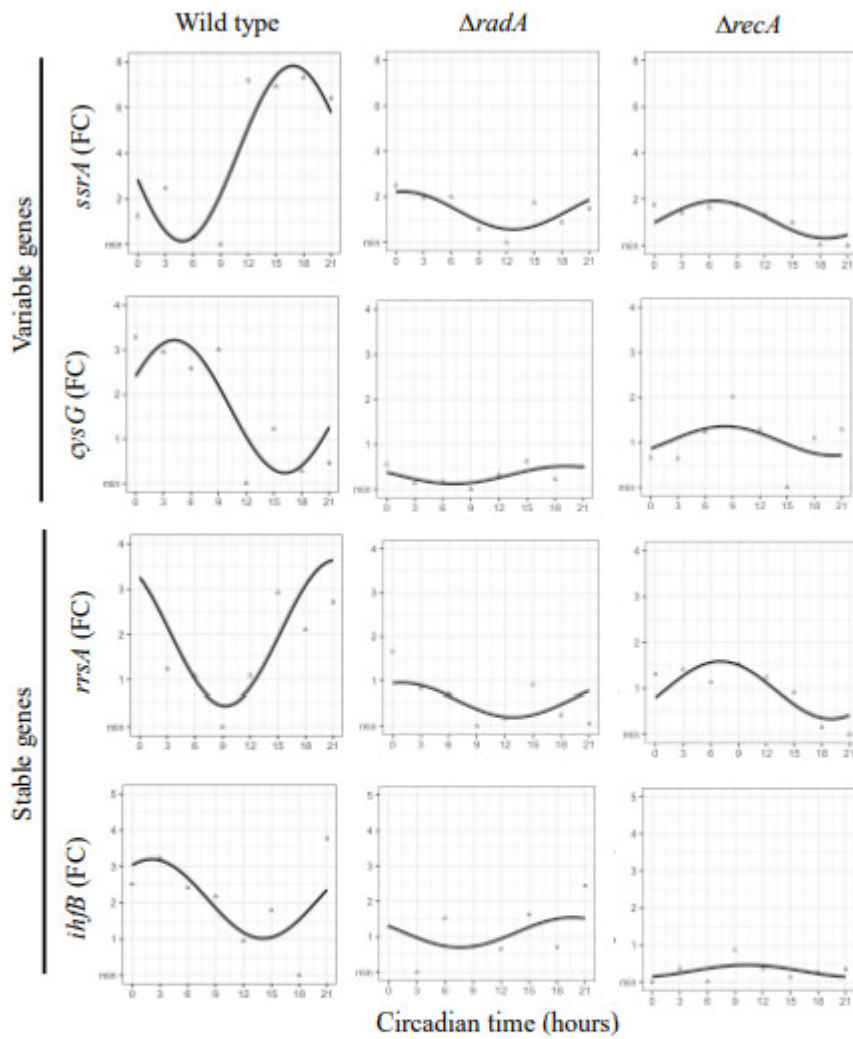

**B.**

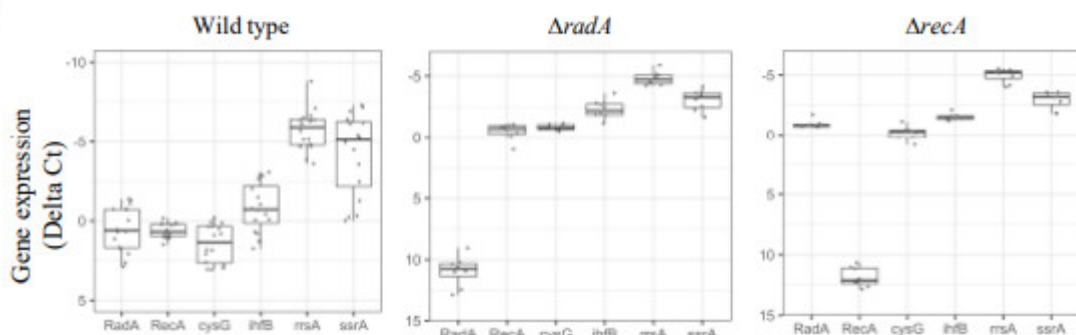

**Figure S2. Circadian expression of variable and stable genes in *E. coli*.** Bacteria were spotted on blood agar with  $7 \times 10^5$  bacteria per point and incubated at  $37^\circ\text{C}$  for 24 hours. Colonies were then collected every 3 hours for 24 hours. (A) The expression of the variable genes (*ssrA* and *cysG*) and the stable genes (*rrsA* and *ihfB*) was evaluated by q-RT-PCR and expressed as fold change (FC) using the  $2^{-\Delta\Delta\text{Ct}}$  formula. The triangles correspond to the raw data without Cosinor transformation; the sinusoids represent the expression of the genes over time after adjustment of the values by the Cosinor model. Statistical analysis was performed using the cosine function in R studio (the results are

representatives of three experiments). (B) The expression of the genes (*radA*, *recA*, *ssrA*, *cysG*, *rrsA* and *ihfB*) was evaluated by q-RTPCR and expressed in  $\Delta$ Ct. The results are represented as boxplot (median of the expression over 24h  $\pm$  interquartile).

**Table S1.** Rhythmic parameters (MESOR, amplitude and acrophase) of *radA* during 3 days culture.

| Gene        | Days | MESOR | CI 95%        | <i>p</i> Value | Amplitude | CI 95%        | <i>p</i> Value | Acrophase | CI 95%          | <i>p</i> value | Signifiant |
|-------------|------|-------|---------------|----------------|-----------|---------------|----------------|-----------|-----------------|----------------|------------|
| <i>radA</i> | 1    | 1.20  | (1.12 ; 1.28) | <0.001         | 0.18      | (0.07 ; 2.20) | 0.001          | 2.16      | (0.00; 4.48)    | 0.006          | Yes        |
|             | 2    | 1.27  | (1.17 ; 1.37) | <0.001         | 0.27      | (0.13 ; 0.41) | <0.001         | 3.78      | (1.86 ; 5.70)   | <0.001         | Yes        |
|             | 3    | 1.24  | (1.10 ; 1.39) | <0.001         | 0.26      | (0.05 ; 0.46) | 0.01           | 19.61     | (16.65 ; 22.58) | 0.003          | Yes        |

**Table S2.** Rhythmic parameters (MESOR, amplitude and acrophase) of *radA* in bacteria cultivated in LB agar.

| Gene        | MESOR | CI 95%        | <i>p</i> Value | Amplitude | CI 95%        | <i>p</i> value | Acrophase | CI 95%          | <i>p</i> value | Signifiant |
|-------------|-------|---------------|----------------|-----------|---------------|----------------|-----------|-----------------|----------------|------------|
| <i>radA</i> | 1.41  | (1.32 ; 1.51) | <0.001         | 0.23      | (0.10 ; 0.37) | <0.001         | 19.92     | (17.75 ; 22.09) | <0.001         | Yes        |
